# Supplementary material
Source: publisher site journal article supplement (https://www.dovepress.com/get_supplementary_file.php?f=373114.docx)
Supplement: Supplementary file 1 [file get_supplementary_file.php]

Tables S1. Association Between RCI and Adverse Hospitalization Outcomes in AECOPD patients

|  | Crude model (OR, 95%CI) | Model 1(OR, 95%CI) | Model 2 (OR, 95%CI) |
| --- | --- | --- | --- |
| RCI (per unit) | 1.18 (1.06, 1.31) | 1.19 (1.06, 1.32) | 1.15 (1.00, 1.31) |
| RCI |  |  |  |
| Lower RCI group | 1.00 (Ref) | 1.00 (Ref) | 1.00 (Ref) |
| Higher RCI group | 1.85 (1.00, 3.44) | 1.91 (1.01, 3.61) | 1.70 (0.81, 3.60) |

Model 1 adjusted for sex, age, BMI and smoking status; Model 2 further adjusted for comorbidities (including diabetes, hypertension, arrhythmia, congestive heart failure, chronic kidney disease and coronary artery disease), therapy in stable stage, inflammatory indicators (including PCT, CRP, LDH), FEV1/FVC, PaCO2.

Tables S2. Association Between RCI and Adverse Hospitalization Outcomes in AECOPD patients

|  | Crude model (OR, 95%CI) | Model 1(OR, 95%CI) | Model 2 (OR, 95%CI) |
| --- | --- | --- | --- |
| RCI (per unit) | 1.18 (1.06, 1.31) | 1.19 (1.06, 1.32) | 1.17 (1.02, 1.33) |
| RCI |  |  |  |
| Lower RCI group | 1.00 (Ref) | 1.00 (Ref) | 1.00 (Ref) |
| Higher RCI group | 1.85 (1.00, 3.44) | 1.90 (1.00, 3.59) | 1.98 (0.94, 4.19) |

Model 1 adjusted for sex, age, BMI and smoking status; Model 2 further adjusted for comorbidities (including diabetes, hypertension, arrhythmia, congestive heart failure, chronic kidney disease and coronary artery disease), therapy in stable stage, inflammatory indicators (including PCT, CRP, LDH), FEV1/FVC, PaCO2.

Tables S3. Association Between RCI and Adverse Hospitalization Outcomes in AECOPD patients

|  | Crude model (OR, 95%CI) | Model 1(OR, 95%CI) | Model 2 (OR, 95%CI) |
| --- | --- | --- | --- |
| RCI (per unit) | 1.18 (1.06, 1.31) | 1.18 (1.06, 1.32) | 1.14 (1.00, 1.30) |
| RCI |  |  |  |
| Lower RCI group | 1.00 (Ref) | 1.00 (Ref) | 1.00 (Ref) |
| Higher RCI group | 1.85 (1.00, 3.44) | 1.89 (1.00, 3.57) | 1.56 (0.73, 3.34) |

Model 1 adjusted for sex, age, BMI and smoking status; Model 2 further adjusted for comorbidities (including diabetes, hypertension, arrhythmia, congestive heart failure, chronic kidney disease and coronary artery disease), therapy in stable stage, inflammatory indicators (including PCT, CRP, LDH), FEV1/FVC, PaCO2.

Tables S4. Association Between RCI and Adverse Hospitalization Outcomes in AECOPD patients

|  | Crude model (OR, 95%CI) | Model 1(OR, 95%CI) | Model 2 (OR, 95%CI) |
| --- | --- | --- | --- |
| RCI (per unit) | 1.18 (1.06, 1.31) | 1.18 (1.06, 1.32) | 1.16 (1.02, 1.33) |
| RCI |  |  |  |
| Lower RCI group | 1.00 (Ref) | 1.00 (Ref) | 1.00 (Ref) |
| Higher RCI group | 1.85 (1.00, 3.44) | 1.89 (1.00, 3.57) | 1.90 (0.89, 4.04) |

Model 1 adjusted for sex, age, BMI and smoking status; Model 2 further adjusted for comorbidities (including diabetes, hypertension, arrhythmia, congestive heart failure, chronic kidney disease and coronary artery disease), therapy in stable stage, inflammatory indicators (including PCT, CRP, LDH), FEV1/FVC, PaCO2.

Tables S5. Association Between RCI and Adverse Hospitalization Outcomes in AECOPD patients

|  | Crude model (OR, 95%CI) | Model 1(OR, 95%CI) | Model 2 (OR, 95%CI) |
| --- | --- | --- | --- |
| RCI (per unit) | 1.18 (1.06, 1.31) | 1.19 (1.06, 1.32) | 1.14 (1.00, 1.31) |
| RCI |  |  |  |
| Lower RCI group | 1.00 (Ref) | 1.00 (Ref) | 1.00 (Ref) |
| Higher RCI group | 1.85 (1.00, 3.44) | 1.90 (1.00, 3.59) | 1.73 (0.81, 3.67) |

Model 1 adjusted for sex, age, BMI and smoking status; Model 2 further adjusted for comorbidities (including diabetes, hypertension, arrhythmia, congestive heart failure, chronic kidney disease and coronary artery disease), therapy in stable stage, inflammatory indicators (including PCT, CRP, LDH), FEV1/FVC, PaCO2.
